# Supplementary material for: Impact of a Childhood Cancer Awareness Program in Kenya: Sociodemographic Insights, Referral Trends, and Barriers to Care for Newly Diagnosed Children
Source: Research Square preprint supplement (doi:10.21203/rs.3.rs-7326216/v1), 2025-08-27
Supplement: Supplementary file 1 [file ff303e50357449b92f087dbd.docx]

**DATA COLLECTION FORM**

Patients ID:

Date of birth: Day: Month: Year:

Gender: Male/ female

Hospital No:

**According to Medical Record:**

Date of first hospital admission: Day: Month: Year:

Diagnosis:

Date of diagnosis at MTRH: Day: Month: Year:

Age at diagnosis: Years: Months:

Classification of age: ≤ 5 years/ 6- 10 years/ > 10 years

Classification of malignancies: Hematological tumors/ Brain tumors/ Solid tumors/ Rare tumors/ Unspecified

Stage of disease at diagnosis: Stage I / Stage II / Stage III / Stage IV / Stage V /

Low risk/ High risk/ Not known / Not applicable

Date of start treatment: Day: Month: Year:

**According to Parental Interview:**

Interview of: *Mother/ Father/ both parents/ other caregiver (specify):*

Date of interview: *Day: Month: Year:*

**Parental background:**

1) Background of father:

a) Age:

b) Education: *no education/ primary school/ high school/ university/ other tertiary education(specify):*

c) Occupation:

d) Religion: *Traditionalist/ christian/ muslim/ none/ other (specify):*

e) Tribal origin:

2) Background of mother:

a) Age:

b) Education: *no education/ primary school/ high school/ university/ other tertiary education(specify):*

c) Occupation:

d) Religion: *Traditionalist/ christian/ muslim/ none/ other (specify):*

e) Tribal origin

**Marital status:**

3) What is the marital status of the parents? *Single/ married/ divorced/ separated/ widowed*

**Siblings:**

4) How many children do you have? *Alive: Deceased: Total:*

**Transportation:**

5a) Residence:…………………

b) Bungoma County: Yes/ no

6 a) Distance from MTRH: ……km

b) Classification of distance: *0-15 km/ 15-30 km/ 30-50 km/ 50-100 km/ >100 km*

7) What mode of transportation do you use to reach MTRH? **(More than 1 answer is possible)**

*Walking/ Public transport/ Renting a vehicle/ Private motorbike/ Private car/ other (specify):*

8a) What is the travel time to MTRH? *<1 hour/ 1-3 hours/ >3 hours (specify):*

b) Is traveling to the hospital: **(More than one “yes” is possible)**

Time consuming: *Yes/ no* Expensive: *Yes/ no* Difficult: *Yes/ no*

**Financial situation and NHIF:**

9a) Does your household have a regular income? *Yes / no*

b) Who is the main economic provider? *Father/ mother/ both parents/ other (specify):*

c) What is the family’s income per month?

d) Do you lose daily wages when you come to MTRH? *Yes/ no*

e) Do you lose profits from farming the land when you come to MTRH? *Yes/ no*

10a) Did you have health-insurance (NHIF) before onset of illness? *Yes/ no*

b) Did you have NHIF when you first came to MTRH? *Yes/ no*

**Onset of symptoms:**

11a ) Date of onset of symptoms:

*Day:……./Beginning/ Mid/ End Month: Year:*

b) Type of symptoms:

b) What did you do after you noticed these symptoms? **(More than 1 “yes” is possible)**

Decided to first wait and watch *Yes/ no*

Sought advice from relatives/friends *Yes/ no*

Went to a herbalist/ traditional healer *Yes/ no*

Sought prayers *Yes/ no*

Went to a health facility *Yes/ no*

Other (specify):

12a) Did you or a relative/ acquaintance see a poster about childhood cancer during a visit to a health facility? *Yes/ no*

If yes, did this poster alert you that your child’s symptoms might be cancer? *Yes/ no*

If yes, did this poster stimulate you to seek medical help for your child? *Yes/ no*

12b) Did you or a relative/ acquaintance hear a radio message about childhood cancer? *Yes/ no*

If yes, did this radio message alert you that your child’s symptoms might be cancer? *Yes/ no*

If yes, did this radio message stimulate you to contact a health-care provider/ health facility? *Yes/ no*

**Alternative treatment:**

**INTERVIEWER:**

| **Research has shown that it is very common and understandable that most families also seek alternative treatment for their children.** |
| --- |

13a) Which types of alternative treatment did you use **before** treatment at MTRH? **(More than 1 “yes” is possible)**

Special food intake *Yes/ no* Traditional healer *Yes/ no*

Praying *Yes/ no* Witchcraft *Yes/no*

Herbalist *Yes/ no* Other (specify):

Chinese medicine *Yes/ no*

b) Which were reasons to use alternative treatment?

Helpful *Yes/ no*

Cheap *Yes/ no*

Easy accessible *Yes/ no*

No side-effects *Yes/ no*

No discomfort *Yes/ no*

Hope for improvement of child’s condition *Yes/ no*

Hope for cure *Yes/ no*

At short distance available *Yes/ no*

Other patients look healthy after taking it *Yes/ no*

Child can stay inside the family *Yes/ no*

Child will not be detained in hospital *Yes/ no*

Certainty of cure *Yes/ no*

Recommended by others *Yes/ no* If yes, specify by whom:

Conventional treatment has no certainty of cure *Yes/ no*

Fear of surgery in hospital *Yes/ no*

No health-insurance *Yes/ no*

Other (specify):

**First contact with conventional health-care:**

14) What was the date of the first contact with a conventional health-care provider?

*Day:……./Beginning/ Mid/ End Month: Year:*

15) Kind of health facility first attended: **(only 1 answer is allowed)**

A) Private clinic

B) Dispensary/ health post (level 1)

C) Health center (level 2 or 3)

D) Primary or secondary public hospital (level 4 or 5)

E) Tertiary public hospital (level 6)

F) Private hospital

16) What was the profession of the first health-care provider you contacted?

*Nurse/ clinical officer/ general practitioner/ pediatrician/ other doctor/ do not know/ other (specify):*

17) What did the health-care provider do?

A) Treated for other illness *yes/ no*

If yes, specify other illness: *malaria/ pneumonia/ typhoid/ do not know/ other (specify):*

If yes, for how long:

B) Referred to another doctor/hospital: *yes/ no*

If yes, referred immediately to MTRH: *yes/ no*

18) Did this health care provider ever mention cancer as a possible diagnosis? *Yes/ no*

If yes, what did the health-care provider tell you?

Cancer is: *curable / not curable/ not discussed*

Seeking conventional cancer treatment was: *encouraged / discouraged/ not discussed*

Conventional cancer treatment is: *affordable / not affordable/ not discussed*

Seeking alternative treatment was: *encouraged/ discouraged/ not discussed*

19a) Did this health-care provider advise you to take health-insurance? *Yes/ no*

b) Did this health-care provider help you with health-insurance registration? *Yes/ no*

**Total number of contacts with conventional health-care**

20) How many visits did you make to other health-care providers/ health facilities before you came to MTRH? Please describe type of health-care providers/ health facilities (level):

**Health-care provider: Health facility: Level**:

| **First visit:** |  |  |  |
| --- | --- | --- | --- |
| **Second visit:** |  |  |  |
| **Third visit:** |  |  |  |
| **Fourth visit:** |  |  |  |
| **Fifth visit:** |  |  |  |
| **Other:** |  |  |  |

**Beliefs:**

21a) Had you heard of cancer before your child was diagnosed with cancer? *Yes/ no*

b) How did you perceive curability of cancer before coming to MTRH?  *Curable/ not curable*

c) What did you think of conventional cancer treatment before coming to MTRH?

*Affordable/ not affordable*

22) What was your opinion about the use of surgery in cancer?

Frightening *Yes/ no* Helpful *Yes/ no*

Spreads cancer *Yes/ no* Necessary *Yes/ no*

Causes death *Yes/ no*

**Reasons for delay in coming to MTRH**

23) Many families encounter difficulties in coming to MTRH for the first time.

a) Have you experienced any of these difficulties to come to MTRH? **(More than one “yes” is possible)**

Hospital costs: *Yes/ no*

Travel costs: *Yes/ no*

Poor transport facilities: *Yes/ no*

Distance from clinic: *Yes/ no*

No health-insurance *Yes/ no*

Loss of daily wages: *Yes/ no*

Nobody to look for other children: *Yes/ no*

Nobody to look for the land: *Yes/ no*

Too busy: *Yes/ no*

Going to work: *Yes/ no*

Child appears ill: *Yes/ no*

Disease of my child may not be curable: *Yes/ no*

Do not see benefit of hospital visit: *Yes/ no*

Time clinic appointment is inconvenient: *Yes/ no*

Not satisfied with provided care in the past: *Yes/ no*

Reputation of long delays in public hospitals: *Yes/ no*

Reputation of corruption in public hospitals: *Yes/ no*

Hospital procedure to clear bill: *Yes/ no*

Detention of child in hospital: *Yes/ no*

Fear of surgery *Yes/ no*

Fear of cancer treatment *Yes/ no*

Side-effects of cancer treatment *Yes/ no*

24a) Before coming to MTRH, had you heard of not being allowed to take your child home in public hospitals? *Yes/ no*

b) If yes, did you delay coming to MTRH because of this? *Yes/ no*

c) Do you think parents would come sooner to public hospitals for cancer treatment, if children were not detained in public hospitals? *Yes/ no*

**Social support:**

25) Before you came to MTRH, what was the reaction of the people around you to the disease in your child?

1. Spouse:

Advised to seek alternative treatment *Yes/ no*

Advised not to attend public hospital *Yes/ no*

1. Grandparents:

Advised to seek alternative treatment *Yes/ no*

Advised not to attend public hospital *Yes/ no*

1. Relatives:

Advised to seek alternative treatment *Yes/ no*

Advised not to attend public hospital *Yes/ no*

1. Friends:

Advised to seek alternative treatment *Yes/ no*

Advised not to attend public hospital *Yes/ no*

1. Village community:

Advised to seek alternative treatment *Yes/ no*

Advised not to attend public hospital *Yes/ no*

1. Religious community:

Advised to seek alternative treatment *Yes/ no*

Advised not to attend public hospital *Yes/ no*

26) In what way did your relatives/ friends/ village and religious community influence your decision to come to MTRH? *Encouraged coming to MTRH/ Discouraged coming to MTRH*

**First contact with MTRH:**

27a) Was your child already diagnosed with cancer before you attended MTRH for the first time?

*Yes/ no*

b) If yes, specify kind of health facility where diagnosis was made:

A) Private clinic

B) Dispensary/ health post (level 1)

C) Health center (level 2 or 3)

D) Primary or secondary public hospital (level 4 or 5)

E) Tertiary public hospital (level 6)

F) Private hospital

c) Date of diagnosis at other health facility: *Day: Month: Year:*

28) Date first seen at MTRH: *Day: Month: Year:*

29) Which department at MTRH did you attend first: **(only 1 answer is allowed)**

A) Sick child clinic

B) Hemato-oncology clinic

C) Private wing outpatient clinic

D) Other (specify):

30) What type of health-care provider treated your child during the first visit to MTRH:

*Nurse/ clinical officer/ general practitioner/ pediatrician/ other doctor/ do not know/ other (specify):*

31) Action taken after first visit to MTRH.

A) Treated for other illness *yes/ no*

If yes, specify other illness: *malaria/ pneumonia/ typhoid/ do not know/ other (specify):*

If yes, for how long:

B) Admitted and investigated for cancer: *yes/ no*

C) Referred to another health facility: *yes/ no*

If yes, specify other health facility:

**According to Calculation:**

**Classification of delays:** **Days:**

| Patient delay (onset symptoms- first contact conventional medical personnel) |  |
| --- | --- |
| Physician delay (first contact conventional medical personnel-diagnosis) |  |
| Diagnosis delay (onset symptoms-diagnosis) |  |
| Treatment delay (diagnosis- start treatment) |  |
| Healthcare system delay (first contact conventional medical personnel –start treatment) |  |
| Total delay (onset symptoms-start treatment) |  |
